# Supplementary material for: A targeted illumination optical fiber probe for high resolution fluorescence imaging and optical switching
Source: PubMed Central journal article supplement (PMC5377356; doi:10.1038/srep45654), 2017-04-03
Supplement: srep45654-s1.pdf [file srep45654-s1.pdf]

# **A targeted illumination optical fiber probe for high resolution fluorescence imaging and optical switching**

Anant Shinde<sup>1,2</sup>, Sandeep Menon Perinchery<sup>1,2</sup> and Murukeshan Vadakke Matham<sup>1,2\*</sup>

<sup>1</sup>School of Mechanical and Aerospace Engineering, Nanyang Technological University, Singapore 639798

<sup>2</sup>Centre for Optical and Laser Engineering, 50 Nanyang Avenue, Singapore 639798

\*Address for Correspondence: [mmurukeshan@ntu.edu.sg](mailto:mmurukeshan@ntu.edu.sg)

## Supplementary Video legends

Supplementary Video 1: Demonstration of multispectral spatiotemporal optical switching

Supplementary Video 2: Targeted optical switching using the developed fiber probe

Supplementary Video 3: Region specific scanning- example 1

Supplementary Video 4: Region specific scanning- example 2

Supplementary Video 5: Demonstration of fiberlet selection control and illumination with selective subcellular illumination.
